# Supplementary material for: Theoretical and machine learning models for reaction-barrier predictions: acrylate and methacrylate radical reactions
Source: Royal Society of Chemistry journal article supplement (doi:10.1039/d4cp04656k), 2024-12-27
Supplement: d4cp04656k1.pdf [file d4cp04656k1.pdf]

## Electronic Supplementary Information

# Theoretical and machine learning models for reaction-barrier predictions: acrylate and methacrylate radical reactions

Makito Takagi,<sup>a\*</sup> Tomomi Shimazaki,<sup>a\*</sup> Osamu Kobayashi,<sup>a</sup> Takayoshi Ishimoto<sup>a,b,c</sup> and Masanori Tachikawa<sup>a\*</sup>

<sup>a</sup> Quantum Chemistry Division, Yokohama City University, Seto 22-2, Kanazawa-ku, Yokohama 236-0027, Kanagawa, Japan.

<sup>b</sup> Smart Innovation Program, Graduate School of Advanced Science and Engineering, Hiroshima University, 1-4-1 Kagamiyama, Higashi-Hiroshima, Hiroshima 739-8527, Japan

<sup>c</sup> Division of Materials Model-Based Research, Digital Monozukuri (Manufacturing) Education and Research Center, Hiroshima University, 1-4-1 Kagamiyama, Higashi-Hiroshima, Hiroshima 739-8527, Japan

\*Authors to whom correspondence should be addressed.

E-mail:

(Makito Takagi) [mtakagi@yokohama-cu.ac.jp](mailto:mtakagi@yokohama-cu.ac.jp)

(Tomomi Shimazaki) [tshima@yokohama-cu.ac.jp](mailto:tshima@yokohama-cu.ac.jp)

(Masanori Tachikawa) [tachi@yokohama-cu.ac.jp](mailto:tachi@yokohama-cu.ac.jp)



## Electronic Supplementary Information

S1.  $\Delta E_{\text{TS}}$  and  $\Delta E_{\text{prod}}$  calculated by DFT and descriptors

S2. The BEP relationship between  $\Delta E_{\text{TS}}$  and  $\Delta E_{\text{prod}}$

S3. Random forest model of  $\Delta E_{\text{TS}}$  (all descriptors from Open Babel and RDkit,  $\text{DP}(m)$ )

S4. Linear regression model of  $\Delta E_{\text{TS}}$  (molecular weight,  $\text{DP}(m)$ )

S5. The relationship between  $\Delta E_{\text{TS}}$  and molecular weight for each category

S6. Predictions of  $\Delta E_{\text{TS}}$  based on theoretical regression models after estimations of  $\Delta E_{\text{prod}}$  based on random forest model with only molecular weight and  $\text{DP}(m)$  descriptors

### S1. $\Delta E_{\text{TS}}$ and $\Delta E_{\text{prod}}$ calculated by DFT and descriptors

The calculated  $\Delta E_{\text{TS}}$  and  $\Delta E_{\text{prod}}$  for all combinations of the 10 monomers, i.e., 100 reactions, are listed in **Table S1**, showing the descriptors for the random forest models (**Fig. 4(c)** in the main manuscript). For convenience, we also showed sequential numbers of reactants (see also **Fig. S1**).

**Table S1.**  $\Delta E_{\text{TS}}$  [kcal/mol] and  $\Delta E_{\text{prod}}$  [kcal/mol] calculated by DFT and descriptors for the random forest model; molecular weight [g/mol] and dummy parameter DP( $m$ ) to represent ACR or MA with  $m$  for specifying X or Y.

| Combination of reactants | $\Delta E_{\text{TS}}$ | $\Delta E_{\text{prod}}$ | DP(X) | Molecular weight (X) | DP(Y) | Molecular weight(Y) |
|--------------------------|------------------------|--------------------------|-------|----------------------|-------|---------------------|
| 01-01                    | 4.94                   | -17.30                   | 0     | 72.0627              | 0     | 72.0627             |
| 01-02                    | 4.26                   | -19.46                   | 0     | 72.0627              | 1     | 86.0892             |
| 01-03                    | 5.19                   | -17.00                   | 0     | 72.0627              | 0     | 86.0892             |
| 01-04                    | 4.56                   | -18.71                   | 0     | 72.0627              | 1     | 100.1158            |
| 01-05                    | 5.58                   | -16.54                   | 0     | 72.0627              | 0     | 128.169             |
| 01-06                    | 4.64                   | -18.48                   | 0     | 72.0627              | 1     | 142.1956            |
| 01-07                    | 5.16                   | -17.31                   | 0     | 72.0627              | 0     | 156.136             |
| 01-08                    | 4.25                   | -19.69                   | 0     | 72.0627              | 1     | 170.1626            |
| 01-09                    | 5.58                   | -16.38                   | 0     | 72.0627              | 0     | 182.2594            |
| 01-10                    | 4.35                   | -18.56                   | 0     | 72.0627              | 1     | 196.286             |
| 02-01                    | 6.17                   | -12.60                   | 1     | 86.0892              | 0     | 72.0627             |
| 02-02                    | 6.76                   | -13.11                   | 1     | 86.0892              | 1     | 86.0892             |
| 02-03                    | 7.94                   | -10.84                   | 1     | 86.0892              | 0     | 86.0892             |
| 02-04                    | 7.19                   | -12.50                   | 1     | 86.0892              | 1     | 100.1158            |
| 02-05                    | 7.15                   | -11.55                   | 1     | 86.0892              | 0     | 128.169             |
| 02-06                    | 7.01                   | -12.54                   | 1     | 86.0892              | 1     | 142.1956            |

|       |      |        |   |          |   |          |
|-------|------|--------|---|----------|---|----------|
| 02-07 | 6.36 | -12.53 | 1 | 86.0892  | 0 | 156.136  |
| 02-08 | 6.45 | -13.57 | 1 | 86.0892  | 1 | 170.1626 |
| 02-09 | 6.95 | -11.70 | 1 | 86.0892  | 0 | 182.2594 |
| 02-10 | 6.46 | -13.03 | 1 | 86.0892  | 1 | 196.286  |
| 03-01 | 4.77 | -17.55 | 0 | 86.0892  | 0 | 72.0627  |
| 03-02 | 4.61 | -19.28 | 0 | 86.0892  | 1 | 86.0892  |
| 03-03 | 5.08 | -17.22 | 0 | 86.0892  | 0 | 86.0892  |
| 03-04 | 5.01 | -18.64 | 0 | 86.0892  | 1 | 100.1158 |
| 03-05 | 5.51 | -16.74 | 0 | 86.0892  | 0 | 128.169  |
| 03-06 | 5.34 | -18.04 | 0 | 86.0892  | 1 | 142.1956 |
| 03-07 | 5.05 | -17.49 | 0 | 86.0892  | 0 | 156.136  |
| 03-08 | 4.99 | -19.14 | 0 | 86.0892  | 1 | 170.1626 |
| 03-09 | 5.42 | -16.65 | 0 | 86.0892  | 0 | 182.2594 |
| 03-10 | 4.40 | -18.74 | 0 | 86.0892  | 1 | 196.286  |
| 04-01 | 5.80 | -13.11 | 1 | 100.1158 | 0 | 72.0627  |
| 04-02 | 6.29 | -13.79 | 1 | 100.1158 | 1 | 86.0892  |
| 04-03 | 8.28 | -10.66 | 1 | 100.1158 | 0 | 86.0892  |
| 04-04 | 7.38 | -12.52 | 1 | 100.1158 | 1 | 100.1158 |
| 04-05 | 7.08 | -11.80 | 1 | 100.1158 | 0 | 128.169  |
| 04-06 | 7.57 | -12.23 | 1 | 100.1158 | 1 | 142.1956 |
| 04-07 | 6.17 | -12.86 | 1 | 100.1158 | 0 | 156.136  |
| 04-08 | 6.55 | -13.68 | 1 | 100.1158 | 1 | 170.1626 |
| 04-09 | 6.85 | -11.98 | 1 | 100.1158 | 0 | 182.2594 |
| 04-10 | 6.60 | -13.13 | 1 | 100.1158 | 1 | 196.286  |
| 05-01 | 4.57 | -17.74 | 0 | 128.169  | 0 | 72.0627  |
| 05-02 | 3.91 | -19.98 | 0 | 128.169  | 1 | 86.0892  |
| 05-03 | 4.90 | -17.38 | 0 | 128.169  | 0 | 86.0892  |

|       |      |        |   |          |   |          |
|-------|------|--------|---|----------|---|----------|
| 05-04 | 4.81 | -18.84 | 0 | 128.169  | 1 | 100.1158 |
| 05-05 | 5.36 | -16.26 | 0 | 128.169  | 0 | 128.169  |
| 05-06 | 4.88 | -18.67 | 0 | 128.169  | 1 | 142.1956 |
| 05-07 | 4.88 | -18.17 | 0 | 128.169  | 0 | 156.136  |
| 05-08 | 4.25 | -20.41 | 0 | 128.169  | 1 | 170.1626 |
| 05-09 | 5.36 | -16.07 | 0 | 128.169  | 0 | 182.2594 |
| 05-10 | 4.37 | -18.09 | 0 | 128.169  | 1 | 196.286  |
| 06-01 | 5.46 | -13.45 | 1 | 142.1956 | 0 | 72.0627  |
| 06-02 | 5.95 | -14.12 | 1 | 142.1956 | 1 | 86.0892  |
| 06-03 | 5.80 | -13.14 | 1 | 142.1956 | 0 | 86.0892  |
| 06-04 | 6.74 | -13.16 | 1 | 142.1956 | 1 | 100.1158 |
| 06-05 | 6.48 | -12.18 | 1 | 142.1956 | 0 | 128.169  |
| 06-06 | 7.25 | -12.54 | 1 | 142.1956 | 1 | 142.1956 |
| 06-07 | 8.85 | -10.64 | 1 | 142.1956 | 0 | 156.136  |
| 06-08 | 8.07 | -12.57 | 1 | 142.1956 | 1 | 170.1626 |
| 06-09 | 6.45 | -12.14 | 1 | 142.1956 | 0 | 182.2594 |
| 06-10 | 6.12 | -13.33 | 1 | 142.1956 | 1 | 196.286  |
| 07-01 | 6.14 | -15.08 | 0 | 156.136  | 0 | 72.0627  |
| 07-02 | 4.38 | -17.62 | 0 | 156.136  | 1 | 86.0892  |
| 07-03 | 6.26 | -14.95 | 0 | 156.136  | 0 | 86.0892  |
| 07-04 | 4.40 | -17.28 | 0 | 156.136  | 1 | 100.1158 |
| 07-05 | 6.52 | -13.77 | 0 | 156.136  | 0 | 128.169  |
| 07-06 | 4.48 | -14.74 | 0 | 156.136  | 1 | 142.1956 |
| 07-07 | 6.38 | -14.82 | 0 | 156.136  | 0 | 156.136  |
| 07-08 | 4.37 | -15.68 | 0 | 156.136  | 1 | 170.1626 |
| 07-09 | 6.27 | -13.81 | 0 | 156.136  | 0 | 182.2594 |
| 07-10 | 4.92 | -13.74 | 0 | 156.136  | 1 | 196.286  |

|       |       |        |   |          |   |          |
|-------|-------|--------|---|----------|---|----------|
| 08-01 | 8.54  | -9.57  | 1 | 170.1626 | 0 | 72.0627  |
| 08-02 | 8.89  | -10.34 | 1 | 170.1626 | 1 | 86.0892  |
| 08-03 | 8.89  | -9.25  | 1 | 170.1626 | 0 | 86.0892  |
| 08-04 | 9.20  | -9.87  | 1 | 170.1626 | 1 | 100.1158 |
| 08-05 | 8.78  | -9.21  | 1 | 170.1626 | 0 | 128.169  |
| 08-06 | 9.18  | -9.42  | 1 | 170.1626 | 1 | 142.1956 |
| 08-07 | 10.06 | -8.44  | 1 | 170.1626 | 0 | 156.136  |
| 08-08 | 8.99  | -11.09 | 1 | 170.1626 | 1 | 170.1626 |
| 08-09 | 8.17  | -9.76  | 1 | 170.1626 | 0 | 182.2594 |
| 08-10 | 7.90  | -10.84 | 1 | 170.1626 | 1 | 196.286  |
| 09-01 | 4.56  | -17.82 | 0 | 182.2594 | 0 | 72.0627  |
| 09-02 | 3.90  | -20.10 | 0 | 182.2594 | 1 | 86.0892  |
| 09-03 | 4.89  | -17.49 | 0 | 182.2594 | 0 | 86.0892  |
| 09-04 | 4.86  | -18.77 | 0 | 182.2594 | 1 | 100.1158 |
| 09-05 | 5.35  | -16.56 | 0 | 182.2594 | 0 | 128.169  |
| 09-06 | 4.91  | -19.16 | 0 | 182.2594 | 1 | 142.1956 |
| 09-07 | 4.89  | -18.53 | 0 | 182.2594 | 0 | 156.136  |
| 09-08 | 4.26  | -20.86 | 0 | 182.2594 | 1 | 170.1626 |
| 09-09 | 5.77  | -15.91 | 0 | 182.2594 | 0 | 182.2594 |
| 09-10 | 4.40  | -18.39 | 0 | 182.2594 | 1 | 196.286  |
| 10-01 | 5.36  | -13.74 | 1 | 196.286  | 0 | 72.0627  |
| 10-02 | 6.46  | -13.86 | 1 | 196.286  | 1 | 86.0892  |
| 10-03 | 5.71  | -13.44 | 1 | 196.286  | 0 | 86.0892  |
| 10-04 | 6.83  | -13.32 | 1 | 196.286  | 1 | 100.1158 |
| 10-05 | 6.45  | -12.36 | 1 | 196.286  | 0 | 128.169  |
| 10-06 | 7.58  | -12.70 | 1 | 196.286  | 1 | 142.1956 |
| 10-07 | 9.02  | -10.76 | 1 | 196.286  | 0 | 156.136  |

|       |      |        |   |         |   |          |
|-------|------|--------|---|---------|---|----------|
| 10-08 | 8.01 | -13.03 | 1 | 196.286 | 1 | 170.1626 |
| 10-09 | 6.36 | -12.40 | 1 | 196.286 | 0 | 182.2594 |
| 10-10 | 6.03 | -13.65 | 1 | 196.286 | 1 | 196.286  |

---

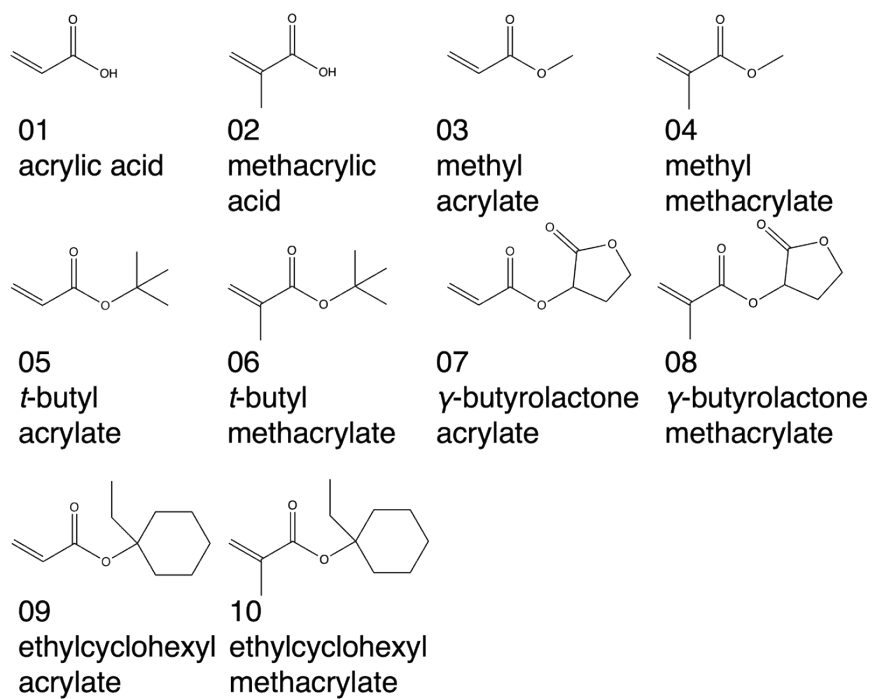

**Fig. S1.** The target reactants and sequential numbers.



## S2. The BEP relationship between $\Delta E_{\text{TS}}$ and $\Delta E_{\text{prod}}$

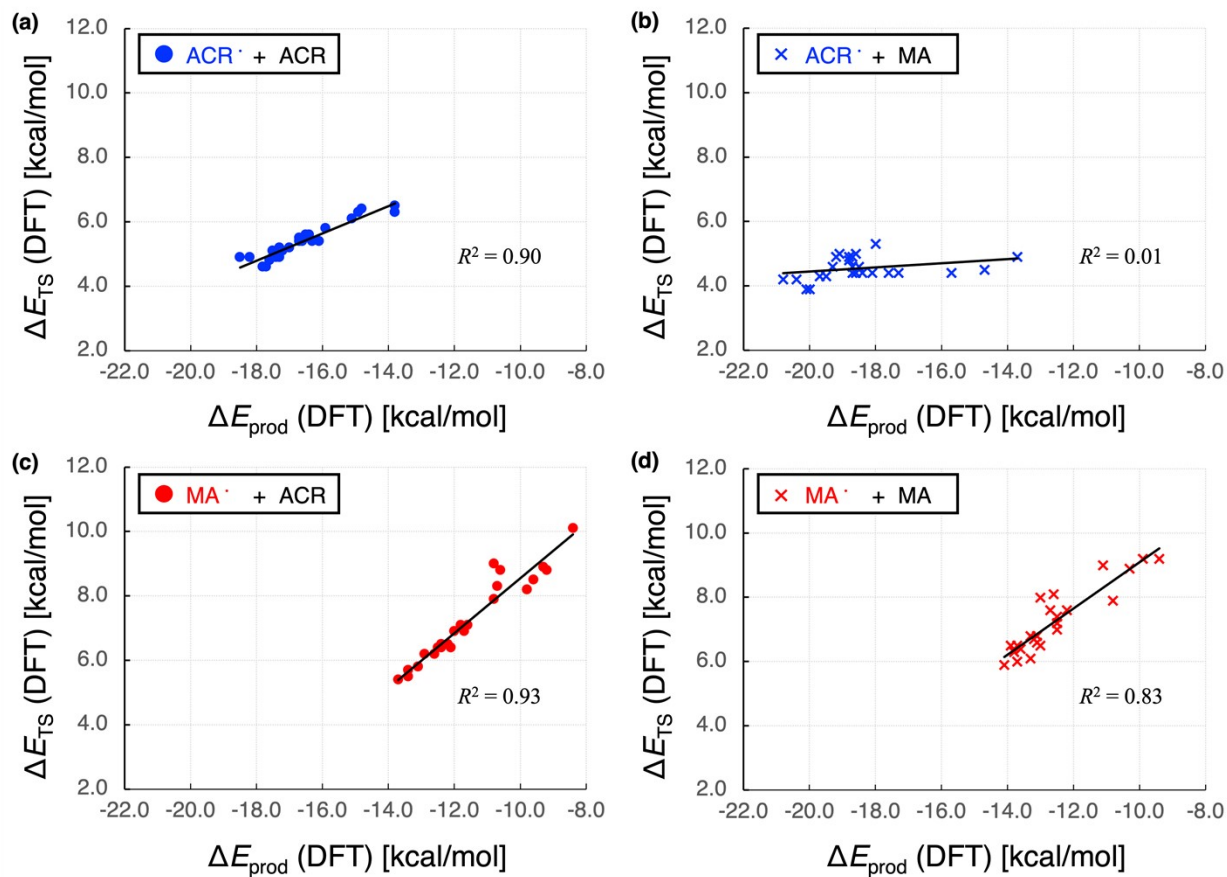

**Fig. S2.** Scatter plot of the  $\Delta E_{\text{TS}}$  with respect to the DFT-obtained  $\Delta E_{\text{prod}}$  for each category (a)  $\text{ACR}^\cdot + \text{ACR}$  (b)  $\text{ACR}^\cdot + \text{MA}$  (c)  $\text{MA}^\cdot + \text{ACR}$  (d)  $\text{MA}^\cdot + \text{MA}$ .

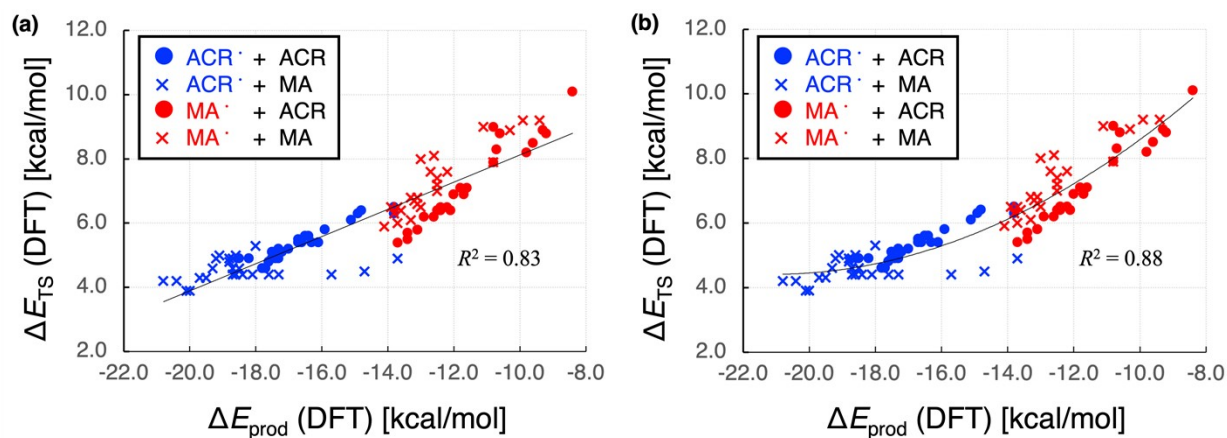

**Fig. S3.** Scatter plot of the  $\Delta E_{TS}$  with respect to the DFT-obtained  $\Delta E_{prod}$  using (a) the BEP approximation line and (b) the quadratic approximation curve. The blue and red colors represent ACR $\cdot$  and MA $\cdot$  for the reactant radical (X $\cdot$ ), respectively. Conversely,  $\bullet$  and  $\times$  represent ACR and MA for the reactant monomer (Y), respectively.

### S3. Random forest model of $\Delta E_{\text{TS}}$ (all descriptors from Open Babel and RDkit, $\text{DP}(m)$ )

We first constructed a machine-learning model with  $R^2 = 0.84$  to predict  $\Delta E_{\text{TS}}$  based on the random forest algorithm with a total of 50 descriptors, using several group contribution methods implemented in Open Babel and RDkit libraries, in addition to the dummy parameter  $\text{DP}(m)$  to represent ACR or MA. For each reactant species, 24 descriptors from group contribution methods are employed: molecular weight, exact mass, number of hydrogen bond donors (HBD), number of hydrogen acceptors (HBA), topological polar surface area (TPSA), partition coefficient (LogP), Molecular refractivity, Melting point, number of single bonds, number of double bonds, number of triple bonds, number of aromatic bonds, number of Rotatable Bonds (NumRotatableBonds), number of aromatic rings (NumAromaticRings), number of saturated rings (NumSaturatedRings), number of rings (RingCount), fraction of  $sp^3$  hybridized carbons (FractionCSP3), quantitative estimate of drug-likeness (qed), Volume, Hansen solubility parameters (HSP-D, HSP-P, HSP-H), and  $\text{DP}(m)$ . We showed the predicted  $\Delta E_{\text{TS}}$  from the random forest model with respect to the calculated  $\Delta E_{\text{TS}}$  by DFT in **Fig. S4**. We also constructed the simpler model described in the main manuscript selecting descriptors above (see also **Fig. 4(c)** in the main manuscript).

**Random forest model (50 descriptors)**

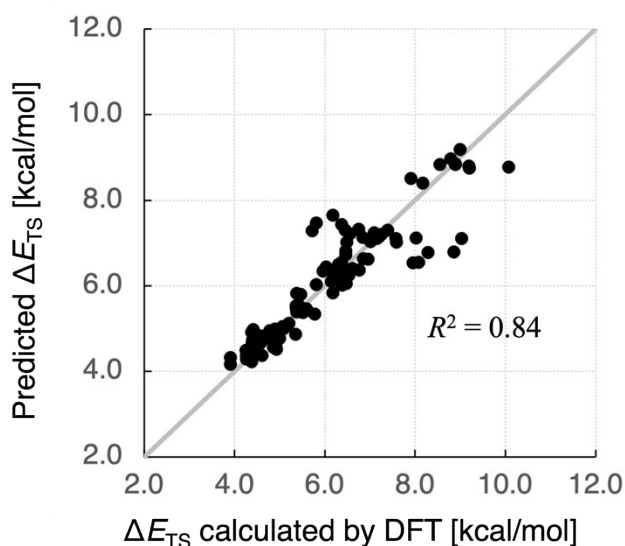

**Fig. S4.** Comparison between machine-learning prediction (the random forest model with 50 descriptors) and DFT calculations on the energy barrier ( $\Delta E_{\text{TS}}$ ).



#### S4. Linear regression model for $\Delta E_{\text{TS}}$ (molecular weight, $\text{DP}(m)$ )

We constructed the simpler model ( $R^2 = 0.80$ ) with only four descriptors, where the molecular weight and the  $\text{DP}(m)$  for each reactant species are employed (see also **Fig. 4(c)** in the main manuscript). In this section, we examined a linear regression model with the same four descriptors (**Fig. S5**). The  $R^2$  value of this linear regression model is 0.63, which is not accurate compared with the random forest model, but roughly reproduces DFT results. Conversely, this linear regression model underestimates DFT results in the high  $\Delta E_{\text{TS}}$  region. These suggest that nonlinear effects exist in the high  $\Delta E_{\text{TS}}$  region. To construct better models over the linear model, we need to deal with nonlinear effects using some machine-learning algorithm.

Linear regression model (molecular weight,  $\text{DP}(m)$ )

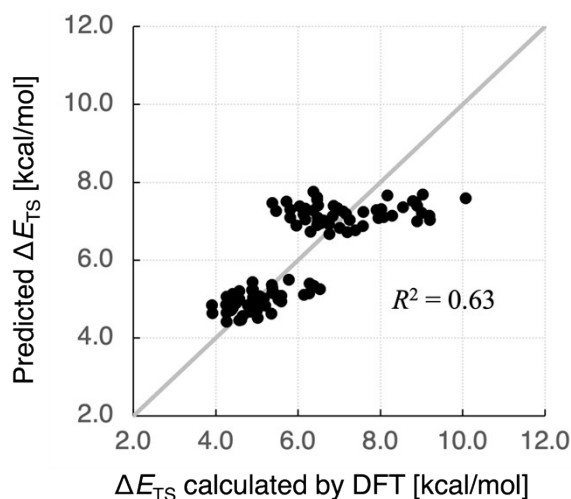

**Fig. S5.** Comparison between the linear regression model and DFT calculations. Here, only molecular weight and dummy parameters are used as descriptors.

### S5. The relationship between $\Delta E_{TS}$ and molecular weight for each category

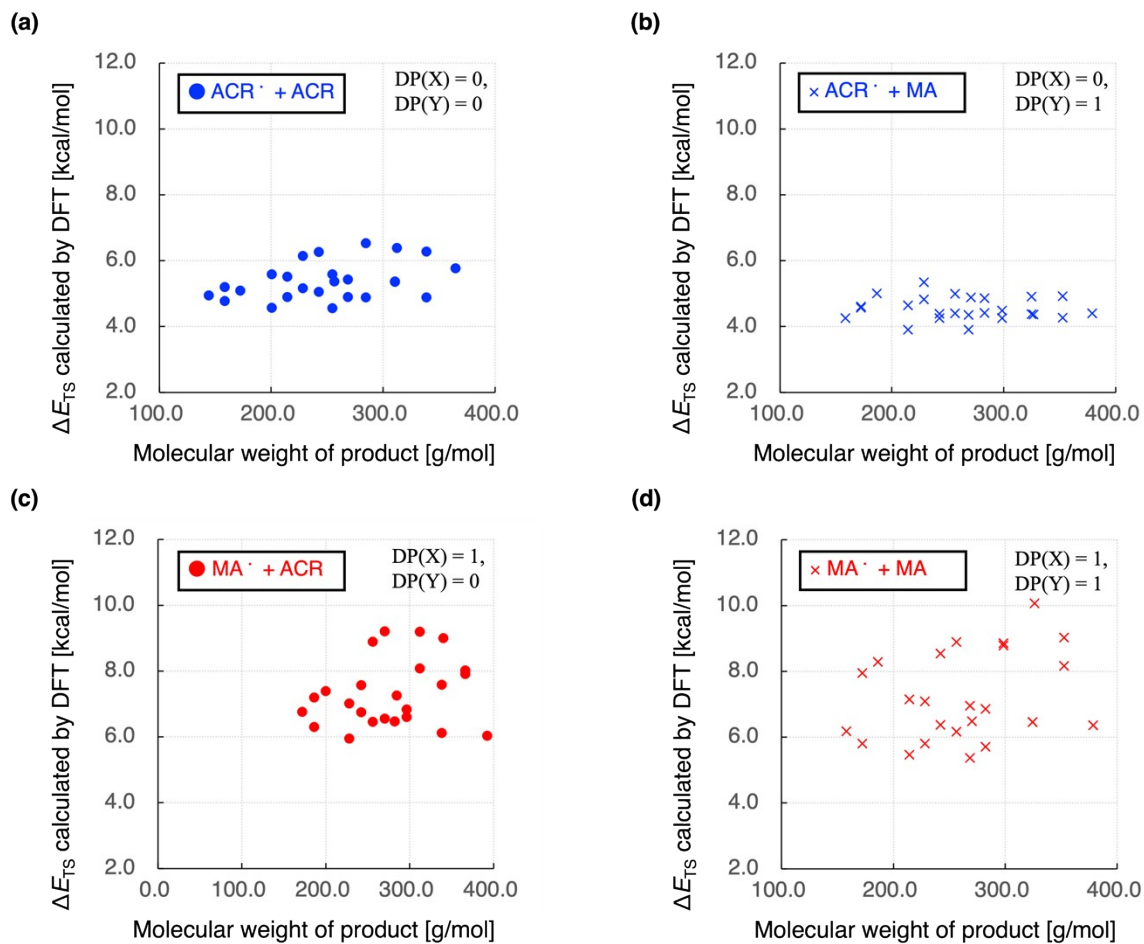

**Fig. S6** Comparisons of  $\Delta E_{TS}$  values predicted by DFT-based calculations and the molecular weight of product for each category. (a) ACR $\cdot$  + ACR (b) ACR $\cdot$  + MA (c) MA $\cdot$  + ACR (d) MA $\cdot$  + MA.

## **S6. Predictions of $\Delta E_{\text{TS}}$ based on theoretical regression models after estimations of $\Delta E_{\text{prod}}$ based on random forest model with only molecular weight and $\text{DP}(m)$ descriptors**

In this section, we describe an collobration approach between theoretical regression and ML models, where  $\Delta E_{\text{prod}}$  is first estimated based on RF-based model and then  $\Delta E_{\text{TS}}$  is predicted using BEP and Marcus-like theoretical models (see also **Eq. (3)** and **(4)**). For the  $\Delta E_{\text{prod}}$  estimation part, we constructed a RF-based model with  $R^2 = 0.92$ , using only four descriptors (molecular weight and the  $\text{DP}(m)$  for each reactant species (**Fig. S7 (a)**). Then, we predicted  $\Delta E_{\text{TS}}$  based on theoretical regression models with  $\Delta E_{\text{prod}}$ , where  $R^2$  values of 0.75 and 0.76 are obtained from the BEP and Marcus-like models, respectively (**Fig. S7 (c)** and **(d)**).

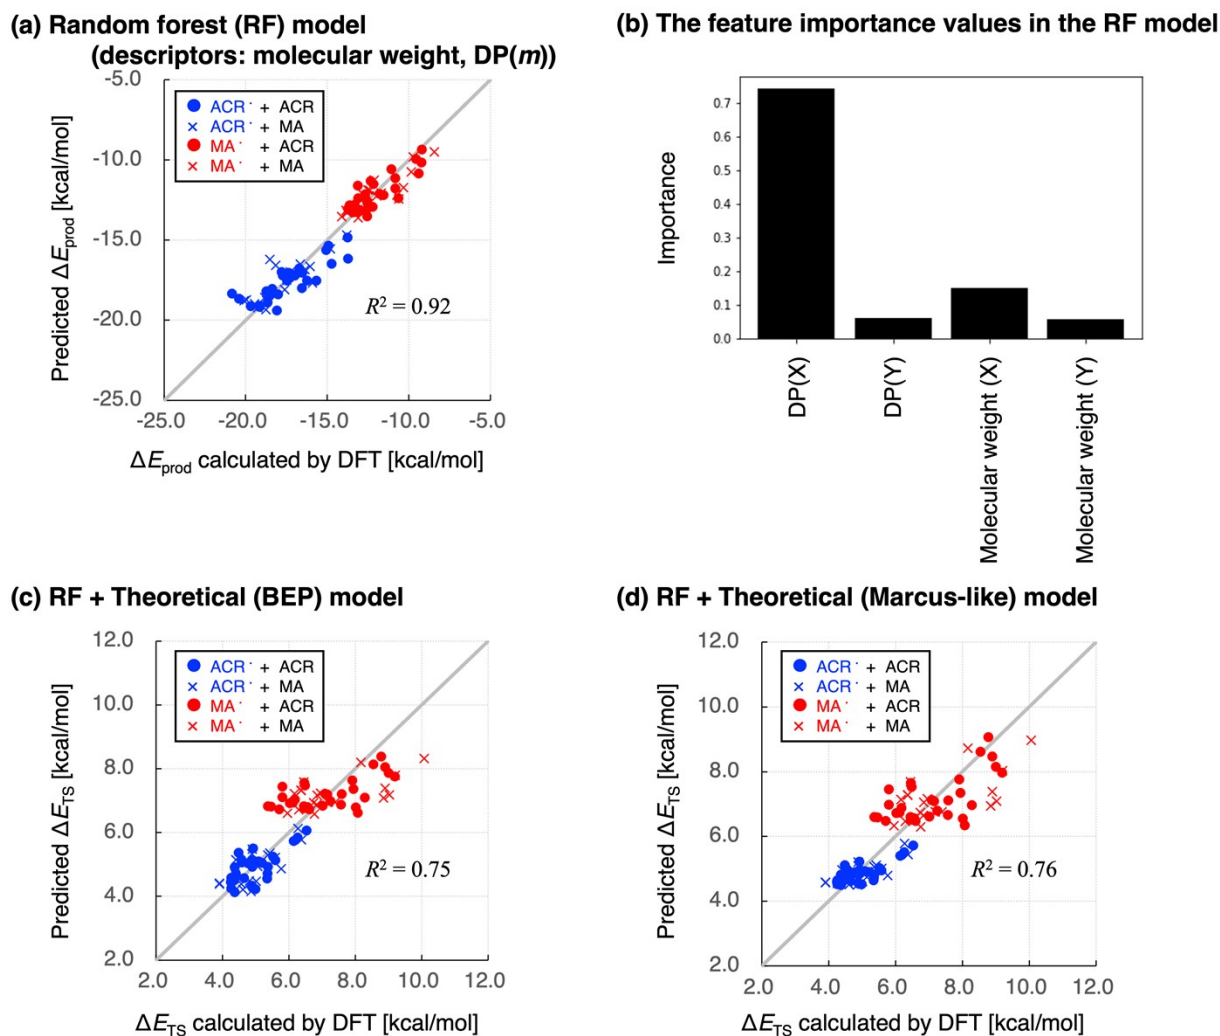

**Fig. S7** (a) Comparisons of  $\Delta E_{\text{prod}}$  values predicted by DFT-based calculations and the RF model using four descriptors; the dummy parameter (DP(*m*)) and molecular weight of each reactant. The blue and red colors represent ACR $\cdot$  and MA $\cdot$  for the reactant radical (X $\cdot$ ), respectively. Conversely,  $\bullet$  and  $\times$  represent ACR and MA for the reactant monomer (Y), respectively. (b) Feature-importance values in the RF-based model. Comparisons of  $\Delta E_{\text{TS}}$  predicted by DFT-based calculations and the RF + theoretical models: (c) BEP model and (d) Marcus-like model.
